# Supplementary material for: Underlying mechanisms of reactive oxygen species and oxidative stress photoinduced by graphene and its surface-functionalized derivatives
Source: Royal Society of Chemistry journal article supplement (doi:10.1039/c9en01295h), 2020-01-01
Supplement: c9en01295h2.xlsx [file c9en01295h2.xlsx]

## Sheet: 1
Aminated graphene
g-6nh2-1				g-6nh2-2
C	-4.86417	0.70015	-0.01528	C	-4.8647	0.69927	-0.02185
C	-3.65274	1.4135	-0.01472	C	-3.65287	1.41181	-0.01316
C	-3.65275	-1.41004	0.00399	C	-3.65477	-1.41194	-0.01219
C	-4.86417	-0.69681	-0.00458	C	-4.86564	-0.69778	-0.02083
C	-2.43603	-0.70159	0.00324	C	-2.43765	-0.70419	-0.0042
C	-2.43603	0.70499	-0.00452	C	-2.4367	0.70245	-0.00414
C	-4e-05	0.70132	0.00685	C	-0.00081	0.69725	0.01334
C	-1.21667	1.40223	-0.002	C	-1.21692	1.39894	0.00499
C	-4.84195	-4.98489	0.02758	C	-4.84631	-4.98602	-0.0166
C	-4.84688	-3.5726	0.01735	C	-4.85027	-3.57375	-0.01804
C	-2.42159	-3.50297	0.01817	C	-2.42502	-3.50566	-0.00393
C	-3.64344	-2.82605	0.01318	C	-3.64637	-2.82799	-0.01142
C	-1.21325	-2.7986	0.01599	C	-1.21627	-2.80198	0.00332
C	-1.21671	-1.39891	0.01018	C	-1.2188	-1.40228	0.00378
C	1.21658	-1.39892	0.01681	C	1.21441	-1.40385	0.01946
C	-5e-05	-0.69806	0.01131	C	-0.00173	-0.70217	0.01219
C	-3.6393	-5.70853	0.03125	C	-3.64414	-5.7105	-0.0098
C	-1.21261	-5.73917	0.02772	C	-1.21744	-5.74251	0.00239
C	-2.42029	-5.0327	0.02601	C	-2.42469	-5.0354	-0.00375
C	-7e-05	-5.03976	0.02387	C	-0.00457	-5.04381	0.009
C	-8e-05	-3.49849	0.01958	C	-0.00358	-3.50262	0.01009
C	1.21311	-2.79861	0.01928	C	1.21004	-2.80353	0.01788
C	-1.21321	2.80187	-0.00834	C	-1.21255	2.79863	0.00579
C	1.21659	1.40225	0.01118	C	1.21621	1.39734	0.02285
C	1e-05	3.50171	-0.00267	C	0.00101	3.49767	0.01591
C	1.21319	2.80191	0.00799	C	1.21366	2.79703	0.02464
C	-3.64342	2.82945	-0.02427	C	-3.64259	2.82784	-0.01335
C	-2.42157	3.50629	-0.02024	C	-2.42035	3.50388	-0.00353
C	2.43589	-0.70156	0.01985	C	2.43419	-0.70735	0.02831
C	2.43593	0.70502	0.01867	C	2.43508	0.69926	0.03055
C	2.42143	-3.50299	0.02142	C	2.41788	-3.50874	0.02407
C	-4.84686	3.57592	-0.03774	C	-4.84544	3.57521	-0.02328
C	1.21248	-5.73921	0.02384	C	1.20739	-5.74404	0.01467
C	2.42017	-5.03274	0.02196	C	2.41558	-5.03845	0.02194
C	3.63922	-5.70857	0.02069	C	3.63417	-5.71515	0.02738
C	4.84189	-4.98489	0.02134	C	4.83729	-4.99229	0.03491
C	4.84673	-3.57257	0.02403	C	4.84306	-3.58004	0.03777
C	3.64327	-2.82604	0.0232	C	3.64014	-2.8327	0.03228
C	3.65258	-1.41001	0.02411	C	3.6504	-1.41666	0.03495
C	6.05725	-5.68867	0.01929	C	6.05213	-5.69682	0.03965
C	7.24153	-5.02617	0.02139	C	7.23681	-5.03515	0.04729
C	7.26871	-3.62624	0.02653	C	7.26493	-3.6352	0.0509
H	8.20519	-3.10861	0.02937	H	8.20168	-3.1181	0.0572
C	6.07012	-2.90563	0.02759	C	6.06688	-2.91383	0.04623
C	4.864	-0.69675	0.0293	C	4.86222	-0.7041	0.0442
C	6.08085	-1.37878	0.03247	C	6.07863	-1.38688	0.05034
C	3.65265	1.41358	0.02502	C	3.65218	1.40704	0.04047
C	4.86404	0.70023	0.03132	C	4.86309	0.69294	0.04743
C	7.29336	-0.67615	0.03992	C	7.29152	-0.68479	0.06014
C	6.08094	1.38212	0.03948	C	6.08036	1.37416	0.05766
C	7.2934	0.67919	0.04407	C	7.29237	0.67053	0.06396
H	8.22051	1.21335	0.05076	H	8.21979	1.20413	0.07177
H	6.04929	-6.75864	0.01599	H	6.0435	-6.76677	0.03719
H	3.65822	-6.77835	0.01933	H	3.65242	-6.78499	0.02581
H	1.21583	-6.80919	0.02533	H	1.2099	-6.81403	0.01345
H	-3.65827	-6.7783	0.03805	H	-3.66382	-6.78035	-0.00924
H	8.2204	-1.21059	0.04239	H	8.21829	-1.21956	0.06465
C	2.42157	3.50636	0.01537	C	2.42237	3.5007	0.03515
C	3.6434	2.82954	0.0249	C	3.64372	2.82308	0.04333
C	4.84686	3.57606	0.03406	C	4.84753	3.56889	0.05429
C	6.0702	2.909	0.04312	C	6.07051	2.90114	0.06192
C	-4.84201	4.98814	-0.04874	C	-4.83961	4.98747	-0.02368
C	-2.42022	5.03593	-0.02905	C	-2.418	5.0336	-0.00307
C	-3.63928	5.71178	-0.04395	C	-3.63651	5.71033	-0.01344
H	-3.65814	6.78156	-0.05168	H	-3.65473	6.78019	-0.01364
C	3e-05	5.04287	-0.00819	C	0.00201	5.03886	0.01746
C	-1.21245	5.74228	-0.02204	C	-1.20987	5.73913	0.00762
H	-1.21571	6.81228	-0.02722	H	-1.21232	6.80912	0.00826
C	2.42031	5.03603	0.01301	C	2.42199	5.03041	0.03782
C	1.21253	5.74235	0.00067	C	1.21479	5.73753	0.02868
C	4.8421	4.98831	0.03418	C	4.84347	4.98116	0.05772
C	3.63939	5.71194	0.02319	C	3.64132	5.70554	0.0494
C	7.26873	3.62941	0.05526	C	7.26939	3.62104	0.07331
C	7.24179	5.02923	0.05666	C	7.24293	5.02103	0.07733
C	6.05765	5.69189	0.04537	C	6.05909	5.68417	0.06958
H	1.2158	6.81232	-0.00202	H	1.21865	6.80751	0.03023
H	3.65829	6.78176	0.02262	H	3.6609	6.77536	0.05194
H	8.205	3.11164	0.06357	H	8.20551	3.10284	0.07898
C	-6.05751	5.69167	-0.06477	C	-6.0544	5.69202	-0.03442
C	-7.2417	5.02907	-0.06824	C	-7.23908	5.03036	-0.04439
C	-6.07025	2.90887	-0.0404	C	-6.06925	2.90904	-0.03289
C	-7.26877	3.62929	-0.05556	C	-7.26724	3.63043	-0.04358
H	-8.2051	3.11156	-0.05766	H	-8.204	3.11337	-0.05115
C	-6.08106	1.38203	-0.02657	C	-6.08106	1.38209	-0.03152
C	-7.29355	0.67912	-0.02536	C	-7.29396	0.68007	-0.03981
H	-8.22067	1.21327	-0.03413	H	-8.22067	1.2149	-0.04743
C	-6.08105	-1.37885	-0.00254	C	-6.08297	-1.37895	-0.02848
C	-7.29356	-0.67619	-0.01301	C	-7.29492	-0.67525	-0.0381
H	-8.22063	-1.21056	-0.01134	H	-8.22239	-1.20879	-0.04415
C	-6.07033	-2.9057	0.01116	C	-6.07323	-2.90592	-0.02612
C	-7.26887	-3.62642	0.01734	C	-7.27219	-3.62574	-0.03191
H	-8.2054	-3.10892	0.01291	H	-8.20827	-3.10746	-0.03825
C	-6.05721	-5.68871	0.03414	C	-6.06205	-5.68895	-0.02205
C	-7.24153	-5.02637	0.02949	C	-7.24589	-5.02572	-0.02929
H	-6.04912	-6.75865	0.04286	H	-1.22132	-6.8125	0.00204
H	-1.21598	-6.80913	0.03195	N	8.50404	5.77622	0.08999
N	8.50285	5.78465	0.07041	H	8.7977	5.95041	-0.84991
H	8.79857	5.95679	-0.8692	H	8.36668	6.64648	0.56302
H	8.36443	6.65598	0.54128	N	-8.4993	5.78711	-0.05609
N	-8.50265	5.78458	-0.0854	H	-8.79341	5.95943	0.884
H	-8.79618	5.9645	0.85345	H	-8.36059	6.65835	-0.52697
H	-8.36516	6.65197	-0.56374	N	-8.50716	-5.78075	-0.03442
N	-8.50229	-5.78227	0.03714	H	-8.78829	-5.9537	-0.97835
H	-8.789	-5.96171	-0.90393	H	-8.37626	-6.65164	0.43929
H	-8.3679	-6.64992	0.5159	N	8.49706	-5.79188	0.05182
N	8.50243	-5.78189	0.01826	H	8.3601	-6.66467	0.5203
H	8.36871	-6.65552	0.48621	H	8.78766	-5.96109	-0.88996
H	8.78813	-5.94947	-0.92535	N	-6.04254	7.16196	-0.03484
N	-6.04715	7.16154	-0.07804	H	-6.85222	7.50169	-0.51336
H	-6.85743	7.4962	-0.55914	H	-6.04799	7.49561	0.90785
H	-6.05255	7.50338	0.86168	H	6.05173	6.75414	0.07253
N	6.04735	7.16181	0.04494	N	-6.05198	-7.15891	-0.01982
H	6.857	7.50092	0.52398	H	-6.05448	-7.49083	0.9235
H	6.05405	7.49485	-0.89794	H	-6.86377	-7.49854	-0.49489
g-6nh2-3				g-6nh2-4
C	-4.89223	0.6951	0.15189	C	-4.89279	0.69498	0.17441
C	-3.68198	1.40992	0.08041	C	-3.68248	1.41141	0.1154
C	-3.68071	-1.40181	0.09036	C	-3.68042	-1.39996	0.0759
C	-4.88906	-0.70018	0.15668	C	-4.88965	-0.70034	0.14539
C	-2.46591	-0.69743	0.07949	C	-2.46652	-0.69546	0.08335
C	-2.4653	0.70398	0.05785	C	-2.46616	0.70586	0.07644
C	-0.03094	0.69265	0.02666	C	-0.03249	0.69441	0.03465
C	-1.24589	1.39678	0.01831	C	-1.24725	1.39876	0.03432
C	-4.75423	-4.93765	-0.4583	C	-4.738	-4.92229	-0.55247
C	-4.85259	-3.564	-0.08032	C	-4.84731	-3.55766	-0.15082
C	-2.45843	-3.48109	0.14368	C	-2.45831	-3.47909	0.12022
C	-3.66937	-2.80653	0.04198	C	-3.66746	-2.80309	0.00627
C	-1.25236	-2.79193	0.15334	C	-1.25318	-2.79023	0.15556
C	-1.24961	-1.39693	0.09676	C	-1.25039	-1.39502	0.104
C	1.17629	-1.41134	0.10859	C	1.17432	-1.40946	0.13441
C	-0.03438	-0.7042	0.07485	C	-0.03574	-0.70228	0.08879
C	-3.75622	-5.6004	0.27327	C	-3.75824	-5.59851	0.19233
C	-1.30453	-5.71728	0.46389	C	-1.31075	-5.71831	0.44834
C	-2.49538	-4.99662	0.29821	C	-2.49804	-4.99627	0.25785
C	-0.07466	-5.03491	0.39016	C	-0.07939	-5.03412	0.41163
C	-0.05281	-3.4992	0.23714	C	-0.05522	-3.49773	0.25873
C	1.1639	-2.80967	0.19105	C	1.16159	-2.8073	0.23039
C	-1.24107	2.79338	-0.02575	C	-1.24235	2.79563	-0.00459
C	1.18627	1.38733	-0.00635	C	1.18419	1.38811	-0.01314
C	-0.02669	3.48913	-0.06658	C	-0.02824	3.49033	-0.07098
C	1.18578	2.78579	-0.0528	C	1.18381	2.78579	-0.07737
C	-3.67252	2.82295	0.03447	C	-3.67272	2.82526	0.09868
C	-2.44977	3.49807	-0.02615	C	-2.45047	3.50106	0.0255
C	2.39696	-0.72161	0.06852	C	2.39467	-0.72008	0.09112
C	2.40265	0.68456	0.0118	C	2.40016	0.68478	0.00662
C	2.36457	-3.52011	0.23192	C	2.36183	-3.51606	0.30159
C	-4.87607	3.5673	0.04909	C	-4.87506	3.56963	0.15545
C	1.13477	-5.74055	0.45059	C	1.12965	-5.73745	0.50814
C	2.35026	-5.04587	0.35319	C	2.3465	-5.04038	0.44297
C	3.56596	-5.72869	0.36458	C	3.563	-5.7198	0.50404
C	4.77288	-5.0155	0.26529	C	4.77112	-5.0054	0.42862
C	4.78765	-3.60544	0.17895	C	4.78559	-3.59807	0.30331
C	3.59014	-2.85185	0.16631	C	3.5877	-2.84736	0.24622
C	3.60817	-1.43685	0.09065	C	3.60584	-1.43423	0.13555
C	5.98282	-5.7281	0.25224	C	5.98259	-5.71378	0.4794
C	7.17061	-5.07654	0.16321	C	7.17073	-5.06146	0.40729
C	7.20744	-3.67799	0.09312	C	7.20681	-3.66681	0.284
H	8.1467	-3.16872	0.02951	H	8.14638	-3.15807	0.22767
C	6.0147	-2.94791	0.10647	C	6.01306	-2.94021	0.23524
C	4.82251	-0.73088	0.04133	C	4.81992	-0.72915	0.07168
C	6.03502	-1.42044	0.04514	C	6.0327	-1.41691	0.10829
C	3.62101	1.3867	-0.02237	C	3.61821	1.38529	-0.05385
C	4.8292	0.66668	-0.00948	C	4.82613	0.66579	-0.02724
C	7.25085	-0.72405	-0.00285	C	7.24817	-0.72243	0.0316
C	6.04886	1.34227	-0.04306	C	6.04521	1.33945	-0.09705
C	7.25787	0.63186	-0.04328	C	7.25429	0.63007	-0.07099
H	8.18824	1.15999	-0.07507	H	8.18376	1.15675	-0.13118
H	5.96792	-6.79618	0.31283	H	5.96885	-6.77933	0.57556
H	3.57976	-6.79551	0.44761	H	3.57655	-6.78477	0.6068
H	1.1307	-6.80391	0.5661	H	1.12495	-6.80083	0.62703
H	-3.94452	-6.5326	0.76413	H	-3.95908	-6.53857	0.66236
H	8.17476	-1.26323	-0.00632	H	8.17289	-1.26031	0.05449
C	2.39595	3.48483	-0.08296	C	2.39357	3.48263	-0.14496
C	3.61625	2.80267	-0.06638	C	3.61331	2.7994	-0.13804
C	4.82256	3.5434	-0.09052	C	4.81877	3.53743	-0.21302
C	6.04373	2.87015	-0.07738	C	6.03972	2.86418	-0.20079
C	-4.87133	4.97729	-0.02581	C	-4.86975	4.98175	0.12476
C	-2.4476	5.0254	-0.09108	C	-2.44818	5.02927	-0.01893
C	-3.6682	5.70034	-0.09802	C	-3.66789	5.7053	0.0308
H	-3.68825	6.76842	-0.15672	H	-3.68838	6.77463	-0.00111
C	-0.02414	5.02858	-0.12364	C	-0.02587	5.02962	-0.13432
C	-1.23762	5.72943	-0.14114	C	-1.23886	5.73248	-0.10646
H	-1.23961	6.79813	-0.19128	H	-1.24112	6.80154	-0.1503
C	2.39908	5.01387	-0.13241	C	2.39619	5.01019	-0.22572
C	1.19168	5.72392	-0.15619	C	1.18939	5.72239	-0.21758
C	4.82289	4.95559	-0.12668	C	4.8184	4.94741	-0.29929
C	3.62195	5.68446	-0.15112	C	3.61811	5.67744	-0.30535
C	7.24494	3.58538	-0.09289	C	7.24006	3.57709	-0.28074
C	7.22417	4.98508	-0.11778	C	7.21755	4.97444	-0.37091
C	6.04249	5.65347	-0.13693	C	6.03616	5.6425	-0.37953
H	1.19792	6.79312	-0.1981	H	1.19582	6.79089	-0.27335
H	3.64521	6.75374	-0.1839	H	3.64158	6.74517	-0.37019
H	8.17913	3.06378	-0.08424	H	8.17436	3.05567	-0.27287
C	-6.08701	5.68009	-0.02891	C	-6.0835	5.68538	0.18945
C	-7.26989	5.0198	0.05706	C	-7.26497	5.02337	0.28536
C	-6.09905	2.90035	0.14008	C	-6.09748	2.90058	0.2451
C	-7.29624	3.62255	0.15435	C	-7.2927	3.62306	0.31539
H	-8.23076	3.10858	0.23708	H	-8.22702	3.10714	0.39106
C	-6.10723	1.3727	0.21815	C	-6.10745	1.37061	0.26215
C	-7.31177	0.66254	0.35213	C	-7.31313	0.65637	0.36314
H	-8.23716	1.19319	0.43899	H	-8.23871	1.18424	0.46095
C	-6.09679	-1.39655	0.23311	C	-6.09819	-1.39874	0.19171
C	-7.3058	-0.69755	0.36882	C	-7.30837	-0.70363	0.33368
H	-8.22447	-1.23463	0.4783	H	-8.22883	-1.24341	0.41297
C	-6.07116	-2.93007	0.146	C	-6.07082	-2.92977	0.06518
C	-7.22678	-3.67703	0.26625	C	-7.22846	-3.67992	0.14112
H	-8.15791	-3.20916	0.50846	H	-8.16554	-3.21847	0.37317
C	-5.98414	-5.63611	-0.31562	C	-5.97006	-5.62415	-0.45738
C	-7.1531	-5.04811	0.06249	C	-7.14843	-5.04594	-0.09441
H	-1.3288	-6.77361	0.6313	H	-1.33885	-6.77609	0.6068
N	8.48983	5.73351	-0.12248	N	8.4805	5.72178	-0.45626
H	8.78252	5.88798	-1.06588	H	8.73938	5.83038	-1.41602
H	8.35843	6.61326	0.33421	H	8.3635	6.6228	-0.03853
N	-8.53059	5.77554	0.04628	N	-8.52286	5.78058	0.35783
H	-8.78189	6.01828	0.98264	H	-8.74265	5.97102	1.31462
H	-8.41489	6.60889	-0.49482	H	-8.42215	6.64259	-0.13899
N	-8.35597	-5.87361	0.24394	N	-8.35431	-5.87646	0.03643
H	-8.8534	-5.9321	-0.62109	H	-8.82932	-5.91522	-0.84275
H	-8.08936	-6.79145	0.53812	H	-8.09389	-6.80068	0.31565
N	8.42488	-5.84308	0.14068	N	8.4269	-5.8231	0.45904
H	8.30796	-6.68969	0.65983	H	8.29358	-6.64908	1.0067
H	8.66414	-6.06263	-0.80548	H	8.70028	-6.07855	-0.46835
H	6.04006	6.7231	-0.16028	H	6.03258	6.71025	-0.44788
H	-6.08081	6.74771	-0.09915	N	-4.29546	-4.9243	-1.95425
N	-4.34769	-4.97071	-1.87162	H	-4.19255	-5.8676	-2.26993
H	-4.25327	-5.92081	-2.16943	H	-4.97496	-4.45606	-2.51905
H	-5.04126	-4.51434	-2.42883	H	-5.97343	-6.66828	-0.69145
N	-5.99765	-7.07806	-0.60129	N	-6.07434	7.15489	0.15371
H	-6.69247	-7.52287	-0.03652	H	-6.13505	7.46561	-0.79481
H	-6.20983	-7.22521	-1.5675	H	-6.85551	7.50572	0.67007
g-6nh2-5				g-6nh2-6
C	-4.88561	0.70001	0.16946	C	-4.89067	0.69062	0.12946
C	-3.67091	1.40429	0.13189	C	-3.67637	1.3965	0.10572
C	-3.68187	-1.41655	0.17573	C	-3.685	-1.42392	0.15775
C	-4.89117	-0.69727	0.1806	C	-4.89495	-0.70651	0.14301
C	-2.4629	-0.71422	0.15092	C	-2.46606	-0.71964	0.13022
C	-2.45819	0.69042	0.1202	C	-2.46227	0.68476	0.09678
C	-0.02501	0.67872	0.0866	C	-0.02733	0.67793	0.05602
C	-1.23716	1.38173	0.07802	C	-1.24104	1.37849	0.05582
C	-4.88151	-4.98599	0.22189	C	-4.88432	-4.99617	0.25275
C	-4.88226	-3.57356	0.20684	C	-4.8845	-3.58286	0.21159
C	-2.45571	-3.51323	0.2033	C	-2.45734	-3.51789	0.20399
C	-3.67646	-2.83207	0.1955	C	-3.67878	-2.83921	0.19591
C	-1.2451	-2.81315	0.18595	C	-1.24714	-2.8167	0.17299
C	-1.2455	-1.41503	0.15541	C	-1.24786	-1.41839	0.13481
C	1.18805	-1.41995	0.13813	C	1.18539	-1.42121	0.10998
C	-0.02754	-0.7182	0.12796	C	-0.02973	-0.71981	0.10083
C	-3.68012	-5.714	0.23657	C	-3.67912	-5.71582	0.30992
C	-1.25087	-5.75166	0.2479	C	-1.252	-5.75541	0.24873
C	-2.45814	-5.04231	0.23041	C	-2.45866	-5.04583	0.24982
C	-0.03554	-5.05524	0.23349	C	-0.03726	-5.05863	0.22316
C	-0.03257	-3.51507	0.19749	C	-0.03479	-3.5181	0.1818
C	1.18258	-2.81788	0.17523	C	1.17979	-2.82001	0.15399
C	-1.22911	2.77835	0.01726	C	-1.23503	2.77508	0.00784
C	1.18974	1.37654	0.04813	C	1.18851	1.37832	0.00861
C	-0.02094	3.47523	-0.05972	C	-0.02748	3.47601	-0.06354
C	1.18615	2.77304	-0.0188	C	1.18489	2.77747	-0.05355
C	-3.65063	2.8175	0.11231	C	-3.65822	2.80938	0.09852
C	-2.42995	3.48021	0.01874	C	-2.4383	3.4748	0.01982
C	2.40819	-0.72433	0.11012	C	2.40515	-0.72486	0.07446
C	2.40864	0.68004	0.06644	C	2.40639	0.68106	0.02013
C	2.39059	-3.52277	0.1885	C	2.38732	-3.52488	0.17046
C	-4.84165	3.57785	0.19795	C	-4.85118	3.56722	0.18328
C	1.17708	-5.75622	0.25082	C	1.1751	-5.75913	0.2378
C	2.38707	-5.05158	0.22939	C	2.38413	-5.0538	0.2181
C	3.60628	-5.72787	0.24418	C	3.60288	-5.72997	0.24233
C	4.81044	-5.00514	0.21842	C	4.80648	-5.00741	0.2216
C	4.81699	-3.59316	0.1786	C	4.81279	-3.59581	0.17031
C	3.61406	-2.84682	0.16391	C	3.61004	-2.84902	0.14429
C	3.62476	-1.43163	0.12422	C	3.62086	-1.43367	0.09211
C	6.02535	-5.70949	0.23248	C	6.02116	-5.71167	0.2528
C	7.21038	-5.04834	0.20722	C	7.20623	-5.05049	0.23284
C	7.23948	-3.64886	0.16692	C	7.23476	-3.65143	0.17741
H	8.17666	-3.13291	0.14682	H	8.17175	-3.13511	0.15996
C	6.04178	-2.92651	0.153	C	6.03695	-2.92994	0.14492
C	4.83711	-0.71746	0.09843	C	4.83263	-0.72133	0.0568
C	6.05388	-1.39867	0.10985	C	6.04903	-1.40368	0.08053
C	3.62433	1.38884	0.04143	C	3.6225	1.38881	-0.02413
C	4.83694	0.67963	0.06173	C	4.83345	0.67521	-0.00294
C	7.26638	-0.69388	0.08245	C	7.26183	-0.7016	0.04548
C	6.05331	1.36598	0.04617	C	6.05034	1.35638	-0.04235
C	7.26626	0.66281	0.05097	C	7.2625	0.65292	-0.01552
H	8.19341	1.19669	0.03063	H	8.18983	1.18592	-0.04357
H	6.01677	-6.77903	0.26324	H	6.01204	-6.7809	0.29303
H	3.62447	-6.79727	0.27483	H	3.62105	-6.79923	0.27702
H	1.17874	-6.82569	0.27977	H	1.17749	-6.82881	0.26501
H	-3.70259	-6.78368	0.25223	H	-3.69822	-6.78081	0.41316
H	8.19386	-1.22747	0.08674	H	8.18884	-1.23569	0.06646
C	2.38954	3.46958	-0.05989	C	2.39095	3.481	-0.10875
C	3.60953	2.80207	0.00277	C	3.61285	2.80417	-0.09021
C	4.8059	3.55821	0.03861	C	4.81538	3.54967	-0.13885
C	6.03599	2.89635	0.02673	C	6.03914	2.88284	-0.1158
C	-4.80959	4.97253	0.4313	C	-4.82365	4.95778	0.43944
C	-2.44171	4.99402	-0.11784	C	-2.45331	4.99031	-0.08775
C	-3.68933	5.60928	-0.1472	C	-3.69984	5.60503	-0.11619
H	-3.80124	6.56542	-0.61409	H	-3.80798	6.56989	-0.56586
C	-0.01994	5.01332	-0.20182	C	-0.03529	5.01595	-0.15954
C	-1.24076	5.70891	-0.24195	C	-1.256	5.70905	-0.18689
H	-1.25407	6.77207	-0.36215	H	-1.27131	6.77507	-0.27926
C	2.40285	4.98252	-0.2103	C	2.38667	5.00926	-0.19195
C	1.20153	5.70277	-0.29213	C	1.17667	5.71512	-0.22001
C	4.78934	4.95693	0.24951	C	4.80914	4.96066	-0.21083
C	3.65119	5.5909	-0.2956	C	3.60569	5.68387	-0.23947
C	7.22529	3.63486	0.00736	C	7.23696	3.60366	-0.15994
C	7.14664	5.01179	-0.21096	C	7.20837	5.00224	-0.22971
C	5.92354	5.58229	-0.30579	C	6.02369	5.66361	-0.25512
H	1.21519	6.7653	-0.41822	H	1.17865	6.78298	-0.28648
H	3.74975	6.53963	-0.78037	H	3.62435	6.75212	-0.29744
H	8.17209	3.1532	0.13504	H	8.17395	3.08752	-0.14058
C	-5.96024	5.61275	-0.06923	C	-5.96868	5.60562	-0.06323
C	-7.18221	5.04648	0.06153	C	-7.19101	5.03652	0.04192
C	-6.07482	2.92149	0.2131	C	-6.08334	2.91004	0.17503
C	-7.26037	3.66537	0.25255	C	-7.2701	3.65229	0.20855
H	-8.20447	3.1853	0.4038	H	-8.21576	3.16899	0.3379
C	-6.09878	1.39134	0.19685	C	-6.10499	1.3803	0.14177
C	-7.31444	0.6932	0.21168	C	-7.31969	0.68112	0.12789
H	-8.23935	1.23113	0.2257	H	-8.24502	1.21819	0.12199
C	-6.11024	-1.3734	0.19728	C	-6.11335	-1.38405	0.14278
C	-7.31985	-0.66368	0.20876	C	-7.32371	-0.67564	0.12329
H	-8.24907	-1.19381	0.21616	H	-8.25257	-1.2065	0.10739
C	-6.10409	-2.90135	0.20316	C	-6.10647	-2.91159	0.16927
C	-7.3045	-3.61819	0.20496	C	-7.30707	-3.62818	0.1584
H	-8.23903	-3.09737	0.20065	H	-8.24025	-3.11053	0.08007
C	-6.09973	-5.68537	0.22233	C	-6.10461	-5.68462	0.35505
C	-7.28201	-5.01843	0.21186	C	-7.28549	-5.02408	0.25786
H	-1.25666	-6.82125	0.27164	H	-1.2578	-6.82526	0.27023
N	8.36704	5.81572	-0.37071	N	8.46819	5.75829	-0.27571
H	8.62906	5.83594	-1.33559	H	8.74742	5.8833	-1.22785
H	8.19624	6.7482	-0.05213	H	8.33641	6.65213	0.15295
N	-8.40251	5.86072	-0.03171	N	-8.41069	5.85151	-0.05331
H	-8.65762	6.1843	0.8793	H	-8.67754	6.15951	0.85978
H	-8.23517	6.64487	-0.62927	H	-8.23662	6.6459	-0.63539
N	-8.54595	-5.76939	0.20737	N	-8.54785	-5.77733	0.2665
H	-8.82691	-5.94291	-0.73668	H	-8.79952	-6.01685	-0.6712
H	-8.41856	-6.63988	0.6825	H	-8.434	-6.61238	0.80475
N	8.47043	-5.8052	0.22226	N	8.46682	-5.80641	0.26928
H	8.33839	-6.66288	0.71903	H	8.33034	-6.65893	0.77406
H	8.75114	-6.0037	-0.71673	H	8.75737	-6.01482	-0.6645
H	5.81563	6.51804	-0.81363	H	6.01511	6.73222	-0.30934
H	-6.09567	-6.75539	0.23081	H	-6.10253	-6.74299	0.51246
H	-5.86632	6.55689	-0.56373	H	-5.86953	6.55855	-0.53932
N	4.78772	5.11662	1.71052	N	-4.78127	5.06824	1.90471
H	5.60512	4.6866	2.09372	H	-4.76802	6.0334	2.16589
H	4.78475	6.08979	1.93939	H	-5.58949	4.62807	2.29589
N	-4.75167	5.10846	1.89377	N	-4.80491	-4.99937	1.72049
H	-4.73504	6.07809	2.13757	H	-5.59768	-4.52105	2.09846

## Sheet: 2
Carboxylated graphene
g-6cooh-1				g-6cooh-2
C	4.84681	-0.16256	-0.00313	C	4.8489	-0.16008	-0.02802
C	3.63193	-0.86814	0.00398	C	3.63309	-0.86403	-0.02426
C	3.64509	1.95508	-0.0017	C	3.64965	1.95915	-0.01069
C	4.85448	1.23353	-0.0063	C	4.85818	1.23605	-0.02193
C	2.42513	1.25134	0.0055	C	2.42884	1.25703	-0.00599
C	2.41735	-0.15606	0.00788	C	2.41938	-0.15041	-0.01327
C	-0.01936	-0.14312	0.01792	C	-0.01718	-0.13445	0.00253
C	1.19263	-0.8507	0.01407	C	1.19391	-0.84355	-0.00951
C	4.84966	5.4978	-0.01478	C	4.85893	5.49998	-0.00364
C	4.85584	4.09929	-0.0123	C	4.86322	4.10159	-0.00972
C	2.42536	4.07241	0.00144	C	2.43251	4.07816	0.00842
C	3.64547	3.3737	-0.00418	C	3.65184	3.37772	-0.00407
C	1.21361	3.35363	0.00865	C	1.21981	3.36098	0.01381
C	1.21119	1.95381	0.01023	C	1.21574	1.96107	0.00618
C	-1.22787	1.96666	0.02131	C	-1.22324	1.97675	0.02432
C	-0.012	1.25822	0.01652	C	-0.00821	1.26695	0.01092
C	3.63837	6.19042	-0.00839	C	3.6486	6.19432	0.00938
C	1.22949	6.22394	0.00602	C	1.23936	6.23135	0.02896
C	2.42753	5.49051	-0.00026	C	2.43661	5.49623	0.01556
C	0.01048	5.55384	0.01332	C	0.01915	5.56281	0.03536
C	0.00256	4.04076	0.01425	C	0.00948	4.04965	0.02703
C	-1.21563	3.36643	0.02062	C	-1.20948	3.37663	0.03296
C	1.18444	-2.25386	0.0163	C	1.18397	-2.24661	-0.0176
C	-1.23866	-0.83795	0.02313	C	-1.23726	-0.82783	0.00637
C	-0.03401	-2.96568	0.02141	C	-0.0353	-2.95689	-0.01489
C	-1.24504	-2.24109	0.02429	C	-1.24536	-2.23093	-0.00282
C	3.61613	-2.28097	0.00707	C	3.61544	-2.27683	-0.03114
C	2.39319	-2.9485	0.01328	C	2.39172	-2.94277	-0.02827
C	-2.44912	1.27693	0.02665	C	-2.44521	1.2884	0.02923
C	-2.45605	-0.13047	0.02705	C	-2.45377	-0.11899	0.01961
C	-2.41981	4.09787	0.02618	C	-2.41297	4.10935	0.04778
C	4.8136	-3.0364	0.00389	C	4.81171	-3.03401	-0.04077
C	-1.20148	6.23667	0.01971	C	-1.19234	6.24707	0.04934
C	-2.40706	5.51585	0.02613	C	-2.39899	5.5274	0.05652
C	-3.61044	6.22838	0.03242	C	-3.60208	6.24094	0.07292
C	-4.82894	5.54861	0.038	C	-4.82125	5.56207	0.08155
C	-4.8499	4.15022	0.03735	C	-4.8432	4.16388	0.0711
C	-3.64718	3.41197	0.03176	C	-3.64105	3.42466	0.05421
C	-3.66168	1.9934	0.03148	C	-3.65694	2.00614	0.04397
C	-6.03139	6.27329	0.0441	C	-6.02329	6.28749	0.10099
C	-7.22481	5.62661	0.04906	C	-7.21721	5.64152	0.10916
C	-7.26812	4.22618	0.04823	C	-7.2614	4.2413	0.09685
H	-8.20988	3.71835	0.05211	H	-8.2035	3.73392	0.10217
C	-6.07609	3.49404	0.04227	C	-6.06988	3.50869	0.07787
C	-4.87862	1.28456	0.03593	C	-4.87453	1.29851	0.04863
C	-6.09418	1.9697	0.0409	C	-6.08921	1.9847	0.06447
C	-3.67802	-0.82984	0.03127	C	-3.67648	-0.81697	0.02339
C	-4.88556	-0.11164	0.03532	C	-4.88309	-0.09753	0.03769
C	-7.30986	1.27276	0.04453	C	-7.30551	1.28914	0.06824
C	-6.10627	-0.78885	0.03874	C	-6.10449	-0.77346	0.04126
C	-7.31576	-0.0818	0.04324	C	-7.31309	-0.06519	0.0564
H	-8.24498	-0.61229	0.04571	H	-8.24298	-0.59458	0.05874
H	-6.00688	7.34301	0.0448	H	-1.20489	7.317	0.05478
H	-1.21526	7.30656	0.01969	H	1.26582	7.301	0.0343
H	1.25439	7.29367	0.00515	H	3.6478	7.26429	0.01464
H	3.63584	7.26041	-0.00975	H	-8.22946	1.82852	0.08046
H	-8.23456	1.81114	0.04825	C	-2.46196	-2.91148	0.00018
C	-2.46094	-2.92307	0.02825	C	-3.67702	-2.22988	0.01295
C	-3.67694	-2.24279	0.03131	C	-4.88291	-2.97158	0.01527
C	-4.88207	-2.98585	0.03432	C	-6.10241	-2.30017	0.02849
C	-6.10243	-2.31567	0.03756	C	4.79299	-4.44621	-0.04744
C	4.79707	-4.4485	0.00756	C	2.37464	-4.45836	-0.03674
C	2.37829	-4.46422	0.0167	C	3.58139	-5.15489	-0.04606
C	3.58642	-5.15903	0.01441	C	-0.04451	-4.38652	-0.02402
C	-0.04145	-4.39537	0.02353	C	1.15255	-5.12117	-0.03491
C	1.15674	-5.12864	0.0219	H	1.12395	-6.19076	-0.04168
H	1.12937	-6.19829	0.02451	C	-2.46446	-4.4272	-0.01052
C	-2.46168	-4.43885	0.02917	C	-1.25092	-5.10572	-0.02233
C	-1.24722	-5.11601	0.02722	C	-4.88253	-4.38388	0.00457
C	-4.88009	-4.39819	0.03407	C	-3.68019	-5.10815	-0.00817
C	-3.67681	-5.12113	0.03185	C	-7.3038	-3.01603	0.03015
C	-7.30306	-3.03293	0.03962	C	-7.28191	-4.41644	0.01876
C	-7.27954	-4.43333	0.03846	C	-6.10004	-5.08367	0.00673
C	-6.09688	-5.09936	0.03603	H	-1.23605	-6.17562	-0.03001
H	-1.2311	-6.18588	0.02846	H	-8.23818	-2.49473	0.04008
H	-8.23809	-2.51272	0.04198	C	6.00122	-5.16169	-0.05548
C	6.0066	-5.16201	0.00418	C	7.19165	-4.50987	-0.05701
C	7.19613	-4.50836	-0.00306	C	6.03982	-2.37831	-0.04369
C	6.04077	-2.37893	-0.00319	C	7.23184	-3.10982	-0.05174
C	7.23405	-3.10829	-0.00665	H	8.17297	-2.60078	-0.05372
H	8.17433	-2.59756	-0.01204	C	6.06166	-0.85156	-0.03785
C	6.06034	-0.85242	-0.0072	C	7.27935	-0.15856	-0.04219
C	7.27701	-0.15807	-0.0149	H	8.20242	-0.69966	-0.04946
H	8.20062	-0.69817	-0.01799	C	6.0816	1.90679	-0.02708
C	6.07706	1.90588	-0.01417	C	7.28901	1.19592	-0.03724
C	7.28527	1.19634	-0.01849	H	8.21977	1.72373	-0.04101
H	8.21553	1.72499	-0.02463	C	6.08159	3.43101	-0.02144
C	6.07504	3.43026	-0.01796	C	7.28223	4.14887	-0.02781
C	7.2747	4.14969	-0.02696	H	8.21789	3.62994	-0.03679
H	8.21104	3.63189	-0.03166	C	6.0699	6.21029	-0.01052
C	6.05969	6.20973	-0.02369	C	7.25555	5.54964	-0.0225
C	7.24625	5.5505	-0.02987	H	6.05816	7.28017	-0.00637
H	6.04647	7.27963	-0.02567	C	8.50505	-5.31375	-0.06445
C	8.51088	-5.31031	-0.00749	C	-8.60584	-5.20316	0.01991
C	-8.60256	-5.22137	0.03994	C	-8.52754	6.45032	0.13226
C	-8.53566	6.43479	0.05551	C	8.57576	6.34245	-0.03034
C	8.56567	6.34476	-0.04008	O	-9.78643	5.77199	0.14143
O	-9.79411	5.75567	0.06074	H	-10.4455	6.31447	-0.29781
H	-10.4499	6.29354	-0.38898	O	-8.58806	-6.63303	0.00849
O	-8.58296	-6.65124	0.03888	H	-7.8031	-6.93969	-0.45128
H	-7.79536	-6.9599	-0.41494	O	9.76129	-4.63057	-0.06574
O	9.76636	-4.62565	-0.01534	H	10.4181	-5.16782	0.38311
H	10.4249	-5.15972	0.4349	O	8.55113	7.77226	-0.02491
O	8.53989	7.77452	-0.04341	H	7.75818	8.08028	-0.46986
H	7.748	8.07935	-0.49239	O	-8.49043	7.7081	0.14317
O	-8.49933	7.69267	0.05611	O	9.67617	5.7321	-0.04159
O	9.66672	5.73543	-0.04554	O	8.47277	-6.57173	-0.06925
O	8.48036	-6.56832	-0.00433	O	-9.70343	-4.58772	0.03084
O	-9.70077	-4.60696	0.04202	H	-3.58765	7.31083	0.07906
H	-3.59658	7.29828	0.03293	C	-6.09435	-6.62364	-0.00458
C	-6.08952	-6.63941	0.03531	O	-5.20191	-7.26613	-0.70035
O	-5.18167	-7.28554	-0.63675	H	-5.19835	-8.22617	-0.70693
H	-5.17728	-8.2456	-0.63719	O	-6.98214	-7.28245	0.68178
O	-6.99132	-7.29463	0.70683	H	3.58445	-6.22484	-0.05202
H	3.59128	-6.22901	0.01773	H	-3.69714	-6.17799	-0.01606
H	-3.69256	-6.19097	0.03218	H	5.98321	-6.23153	-0.06036
C	5.98301	-6.70169	0.00849	C	-5.98696	7.82692	0.11353
O	6.78152	-7.36677	-0.77467	O	-6.85569	8.5039	-0.57956
H	7.38497	-6.89752	-1.35537	H	-7.51956	8.04361	-1.09819
O	5.16453	-7.33753	0.79529	O	-5.08754	8.4507	0.81731
g-6cooh-3				g-6cooh-4
C	-4.64916	-1.88578	-0.08805	C	-4.62351	-1.90875	0.01522
C	-3.308	-2.31969	-0.14425	C	-3.28251	-2.33853	-0.06742
C	-3.92429	0.42821	0.03733	C	-3.90534	0.412	0.08941
C	-4.95238	-0.52665	0.01239	C	-4.93052	-0.54907	0.09966
C	-2.58218	0.00453	-0.03185	C	-2.56238	-0.01022	0.01263
C	-2.27403	-1.36494	-0.11011	C	-2.25136	-1.38008	-0.06018
C	0.10372	-0.81748	-0.13281	C	0.12506	-0.82722	-0.114
C	-0.9305	-1.77567	-0.15382	C	-0.9072	-1.78764	-0.12258
C	-5.82433	3.61516	0.64244	C	-5.85929	3.6036	0.59203
C	-5.54848	2.27454	0.28487	C	-5.53823	2.2511	0.32164
C	-3.17992	2.72746	0.10781	C	-3.16494	2.7121	0.15279
C	-4.21977	1.80635	0.13884	C	-4.20434	1.79328	0.17362
C	-1.85318	2.31337	0.03856	C	-1.83701	2.299	0.08386
C	-1.54664	0.95357	-0.02124	C	-1.52845	0.94026	0.01577
C	0.82224	1.51043	-0.08008	C	0.83974	1.5014	-0.05402
C	-0.20637	0.54745	-0.07702	C	-0.18742	0.53671	-0.05059
C	-4.88077	4.53248	0.13485	C	-4.86121	4.51262	0.16733
C	-2.5198	5.17373	0.07368	C	-2.50422	5.15547	0.17845
C	-3.52985	4.2064	0.11692	C	-3.51339	4.18652	0.1835
C	-1.18069	4.75702	0.04347	C	-1.16569	4.74182	0.13307
C	-0.8361	3.26723	0.0172	C	-0.82035	3.25377	0.07529
C	0.50135	2.87673	-0.03469	C	0.51718	2.86618	0.00949
C	-0.61809	-3.14235	-0.22099	C	-0.59211	-3.15372	-0.1938
C	1.44685	-1.224	-0.16974	C	1.46886	-1.23054	-0.1684
C	0.7221	-3.54569	-0.24013	C	0.74867	-3.55355	-0.23667
C	1.75765	-2.59069	-0.20023	C	1.78242	-2.59624	-0.20902
C	-2.99363	-3.69891	-0.23392	C	-2.96554	-3.7175	-0.15583
C	-1.64699	-4.1096	-0.27165	C	-1.6189	-4.12406	-0.22318
C	2.1647	1.10712	-0.13332	C	2.18251	1.10136	-0.12344
C	2.47945	-0.26392	-0.17686	C	2.49944	-0.26833	-0.1814
C	1.51507	3.85444	-0.04501	C	1.52932	3.8457	0.00456
C	-4.016	-4.67221	-0.28563	C	-3.98542	-4.6947	-0.17637
C	-0.14039	5.6805	0.03494	C	-0.12718	5.66688	0.13508
C	1.19229	5.23584	-0.00493	C	1.205	5.22566	0.07049
C	2.2104	6.19391	-0.00601	C	2.22095	6.18585	0.07039
C	3.54662	5.79873	-0.05567	C	3.55698	5.79422	-0.0031
C	3.87334	4.43988	-0.10527	C	3.88543	4.43676	-0.07475
C	2.8633	3.45428	-0.09817	C	2.87732	3.4491	-0.06865
C	3.19036	2.07262	-0.14584	C	3.20628	2.06894	-0.1365
C	4.55964	6.77053	-0.05684	C	4.56816	6.76801	-0.00579
C	5.86487	6.40387	-0.11164	C	5.87327	6.40431	-0.08099
C	6.2139	5.04841	-0.16678	C	6.2239	5.05029	-0.15704
H	7.24368	4.76101	-0.21151	H	7.25347	4.76522	-0.21764
C	5.21211	4.07165	-0.16305	C	5.22392	4.07186	-0.15334
C	4.53497	1.64985	-0.20889	C	4.55086	1.64974	-0.21937
C	5.56616	2.591	-0.22308	C	5.57994	2.59306	-0.23568
C	3.82367	-0.67743	-0.23264	C	3.84388	-0.67833	-0.25605
C	4.85368	0.2875	-0.25949	C	4.87162	0.2889	-0.28697
C	6.90496	2.19015	-0.29206	C	6.91857	2.19616	-0.32643
C	6.20824	-0.09339	-0.33836	C	6.22595	-0.08811	-0.38603
C	7.21897	0.87613	-0.35134	C	7.2345	0.88363	-0.40308
H	8.24438	0.57569	-0.40844	H	8.25963	0.58604	-0.47695
H	4.30053	7.80774	-0.01458	H	4.30791	7.80435	0.05159
H	1.96339	7.23441	0.03074	H	1.97232	7.22506	0.12595
H	-0.35478	6.72864	0.05854	H	-0.34267	6.71382	0.18434
H	-5.20595	5.47955	-0.24231	H	-5.15598	5.47412	-0.19797
H	7.68238	2.92529	-0.29874	H	7.69422	2.9332	-0.33578
C	3.10179	-2.99437	-0.19385	C	3.1276	-2.99679	-0.22364
C	4.12537	-2.05199	-0.26153	C	4.14821	-2.05176	-0.29861
C	5.58555	-2.52773	-0.37199	C	5.60798	-2.52324	-0.43108
C	6.58921	-1.5755	-0.41452	C	6.6091	-1.56851	-0.47911
C	-3.70316	-6.03085	-0.38193	C	-3.67085	-6.05261	-0.27721
C	-1.3429	-5.49103	-0.36114	C	-1.31273	-5.50461	-0.31942
C	-2.37063	-6.4372	-0.42127	C	-2.33855	-6.45418	-0.35358
H	-2.13301	-7.47776	-0.49667	H	-2.09949	-7.49376	-0.4368
C	1.03332	-5.04571	-0.3159	C	1.06241	-5.05254	-0.32317
C	-0.01928	-5.94988	-0.38982	C	0.01111	-5.95936	-0.3796
H	0.18126	-6.99813	-0.46536	H	0.21299	-7.00674	-0.46484
C	3.46979	-4.4762	-0.10196	C	3.50043	-4.4782	-0.146
C	2.35262	-5.49736	-0.3097	C	2.38273	-5.50081	-0.34274
C	5.92036	-3.89227	-0.43986	C	5.94486	-3.88637	-0.51287
C	4.92603	-4.87938	-0.37255	C	4.95362	-4.87607	-0.43993
C	7.92632	-1.97036	-0.52956	C	7.9455	-1.9595	-0.61417
C	8.2459	-3.33308	-0.61682	C	8.26683	-3.32083	-0.71455
C	7.265	-4.27228	-0.57621	C	7.28846	-4.26244	-0.66863
H	2.57681	-6.53551	-0.4399	H	2.60736	-6.5374	-0.48385
H	5.18272	-5.9101	-0.50189	H	5.21066	-5.90512	-0.58081
H	7.51942	-5.30929	-0.64625	H	7.54408	-5.29837	-0.74927
H	8.70281	-1.23459	-0.5532	H	8.72009	-1.22188	-0.6428
C	-4.72601	-6.99084	-0.43829	C	-4.6917	-7.01644	-0.30046
C	-6.02853	-6.61211	-0.39622	C	-5.99343	-6.6421	-0.21949
C	-5.35327	-4.29131	-0.24088	C	-5.32199	-4.3185	-0.09548
C	-6.36488	-5.25609	-0.29592	C	-6.33124	-5.28695	-0.11471
H	-7.3923	-4.95905	-0.26155	H	-7.35803	-4.99329	-0.04988
C	-5.69263	-2.81017	-0.13012	C	-5.66377	-2.83816	0.01386
C	-7.02831	-2.3887	-0.07112	C	-6.99896	-2.42279	0.11058
H	-7.8181	-3.1095	-0.11222	H	-7.78516	-3.14854	0.11286
C	-6.28886	-0.12481	0.08967	C	-6.26794	-0.15308	0.19325
C	-7.32113	-1.07035	0.03933	C	-7.29569	-1.10433	0.20099
H	-8.34132	-0.75147	0.08897	H	-8.31551	-0.78947	0.27715
C	-6.60466	1.36415	0.23415	C	-6.58794	1.33779	0.27485
C	-7.92519	1.82026	0.32594	C	-7.91169	1.80292	0.27972
H	-8.73779	1.13117	0.42471	H	-8.73147	1.13057	0.42412
C	-7.09298	4.0272	0.18989	C	-7.05719	3.99269	-0.02253
C	-8.15718	3.19548	0.25765	C	-8.13071	3.1689	0.04822
H	-4.47685	-8.02863	-0.51465	C	6.97214	7.48322	-0.08292
C	6.96579	7.48077	-0.11369	C	9.73668	-3.75069	-0.87705
C	9.71682	-3.76687	-0.759	C	-7.10249	-7.71032	-0.24245
C	-7.14008	-7.67621	-0.45856	C	-9.55692	3.71347	-0.15408
C	-9.59345	3.7496	0.22166	O	-9.743	4.98089	-0.38291
O	-9.79392	5.03292	0.14117	H	-8.99124	5.57637	-0.42589
H	-9.04649	5.63422	0.10426	O	-8.35144	-7.35342	-0.16354
O	-8.38963	-7.31509	-0.41804	H	-9.04274	-8.01935	-0.17728
H	-9.08254	-7.97841	-0.4568	O	10.0391	-5.01299	-0.96945
O	10.0181	-5.03022	-0.84035	H	9.34598	-5.67639	-0.93606
H	9.32344	-5.69221	-0.81192	O	8.22426	7.13637	-0.15502
O	8.21775	7.13051	-0.16871	H	8.4629	6.20797	-0.207
H	8.45461	6.20106	-0.20885	O	6.64857	8.7417	-0.01245
O	6.64434	8.74068	-0.06051	O	-10.576	2.90632	-0.09619
O	-10.6067	2.93468	0.27173	O	-6.79058	-8.96979	-0.34062
O	-6.82979	-8.93653	-0.55171	O	10.6763	-2.85155	-0.9219
O	10.6586	-2.86969	-0.79788	H	-2.75042	6.19636	0.20698
H	-2.76507	6.21524	0.06665	C	-6.03416	3.6627	2.12086
C	-5.78034	3.62913	2.18174	O	-6.35389	4.78521	2.69625
O	-6.00521	4.73556	2.82878	H	-6.48068	5.57645	2.16766
H	-6.19766	5.54303	2.34643	O	-5.86223	2.59007	2.83735
O	-5.51834	2.53484	2.83531	H	-7.12462	4.92968	-0.53487
C	-7.26991	5.44018	-0.39635	C	-4.33205	-8.50922	-0.41762
O	-6.25168	6.24728	-0.4687	O	-5.01369	-9.39676	0.24645
H	-6.36241	7.12783	-0.8348	H	-5.74111	-9.12094	0.80884
O	-8.43802	5.82719	-0.81961	O	-3.34656	-8.88319	-1.1806
g-6cooh-5				g-6cooh-6
C	-4.62351	-1.90875	0.01522	C	-4.85673	0.69009	0.03989
C	-3.28251	-2.33853	-0.06742	C	-3.64537	1.40159	0.03823
C	-3.90534	0.412	0.08941	C	-3.64131	-1.41875	-0.0075
C	-4.93052	-0.54907	0.09966	C	-4.85469	-0.70667	0.00377
C	-2.56238	-0.01022	0.01263	C	-2.42543	-0.70901	0.00018
C	-2.25136	-1.38008	-0.06018	C	-2.42787	0.6956	0.01133
C	0.12506	-0.82722	-0.114	C	0.00746	0.69979	-0.01168
C	-0.9072	-1.78764	-0.12258	C	-1.20946	1.395	-0.00172
C	-5.85929	3.6036	0.59203	C	-4.82389	-4.99746	-0.09018
C	-5.53823	2.2511	0.32164	C	-4.83035	-3.5837	-0.0582
C	-3.16494	2.7121	0.15279	C	-2.40457	-3.5075	-0.00484
C	-4.20434	1.79328	0.17362	C	-3.62855	-2.8344	-0.02434
C	-1.83701	2.299	0.08386	C	-1.19738	-2.80101	0.00136
C	-1.52845	0.94026	0.01577	C	-1.20417	-1.40252	-0.00189
C	0.83974	1.5014	-0.05402	C	1.2292	-1.39462	-0.00105
C	-0.18742	0.53671	-0.05059	C	0.01098	-0.69848	-0.00471
C	-4.86121	4.51262	0.16733	C	-3.61934	-5.7114	0.02916
C	-2.50422	5.15547	0.17845	C	-1.19045	-5.73992	0.03754
C	-3.51339	4.18652	0.1835	C	-2.40033	-5.03555	0.01867
C	-1.16569	4.74182	0.13307	C	0.02151	-5.03802	0.03235
C	-0.82035	3.25377	0.07529	C	0.01783	-3.49727	0.01405
C	0.51718	2.86618	0.00949	C	1.22958	-2.7939	0.0115
C	-0.59211	-3.15372	-0.1938	C	-1.20939	2.79222	-0.01062
C	1.46886	-1.23054	-0.1684	C	1.22047	1.40621	-0.03033
C	0.74867	-3.55355	-0.23667	C	-0.00436	3.49979	-0.05527
C	1.78242	-2.59624	-0.20902	C	1.21107	2.80632	-0.05478
C	-2.96554	-3.7175	-0.15583	C	-3.63334	2.81416	0.07104
C	-1.6189	-4.12406	-0.22318	C	-2.4159	3.48638	0.01393
C	2.18251	1.10136	-0.12344	C	2.44614	-0.69262	-0.00962
C	2.49944	-0.26833	-0.1814	C	2.44144	0.71409	-0.02743
C	1.52932	3.8457	0.00456	C	2.43998	-3.49403	0.02189
C	-3.98542	-4.6947	-0.17637	C	-4.82996	3.56451	0.17433
C	-0.12718	5.66688	0.13508	C	1.23667	-5.73391	0.04448
C	1.205	5.22566	0.07049	C	2.44309	-5.02367	0.03968
C	2.22095	6.18585	0.07039	C	3.66487	-5.69516	0.05126
C	3.55698	5.79422	-0.0031	C	4.86531	-4.96691	0.04599
C	3.88543	4.43676	-0.07475	C	4.86565	-3.55463	0.02832
C	2.87732	3.4491	-0.06865	C	3.65985	-2.8126	0.01643
C	3.20628	2.06894	-0.1365	C	3.66476	-1.39643	-0.00121
C	4.56816	6.76801	-0.00579	C	6.08315	-5.66601	0.05843
C	5.87327	6.40431	-0.08099	C	7.26503	-4.99923	0.05326
C	6.2239	5.05029	-0.15704	C	7.28762	-3.59933	0.03529
H	7.25347	4.76522	-0.21764	H	8.22225	-3.0785	0.03131
C	5.22392	4.07186	-0.15334	C	6.08685	-2.88297	0.02236
C	4.55086	1.64974	-0.21937	C	4.87349	-0.67822	-0.01067
C	5.57994	2.59306	-0.23568	C	6.0926	-1.35573	0.00103
C	3.84388	-0.67833	-0.25605	C	3.65466	1.42781	-0.04334
C	4.87162	0.2889	-0.28697	C	4.86848	0.71923	-0.0326
C	6.91857	2.19616	-0.32643	C	7.30248	-0.64814	-0.00705
C	6.22595	-0.08811	-0.38603	C	6.08259	1.40616	-0.04434
C	7.2345	0.88363	-0.40308	C	7.29767	0.70747	-0.02957
H	8.25963	0.58604	-0.47695	H	8.22299	1.24472	-0.03631
H	4.30791	7.80435	0.05159	H	6.07918	-6.73586	0.07219
H	1.97232	7.22506	0.12595	H	3.68777	-6.76493	0.06415
H	-0.34267	6.71382	0.18434	H	1.24309	-6.80379	0.05734
H	-5.15598	5.47412	-0.19797	H	-3.63791	-6.77658	0.12917
H	7.69422	2.9332	-0.33578	H	8.23159	-1.17881	0.00433
C	3.1276	-2.99679	-0.22364	C	2.41442	3.51612	-0.08127
C	4.14821	-2.05176	-0.29861	C	3.63917	2.84415	-0.07087
C	5.60798	-2.52324	-0.43108	C	4.83884	3.59549	-0.08889
C	6.6091	-1.56851	-0.47911	C	6.0653	2.93352	-0.07431
C	-3.67085	-6.05261	-0.27721	C	-4.80884	4.94875	0.46345
C	-1.31273	-5.50461	-0.31942	C	-2.43699	5.00407	-0.05522
C	-2.33855	-6.45418	-0.35358	C	-3.68646	5.61377	-0.07436
H	-2.09949	-7.49376	-0.4368	H	-3.79796	6.58795	-0.50266
C	1.06241	-5.05254	-0.32317	C	-0.01835	5.04169	-0.11073
C	0.01111	-5.95936	-0.3796	C	-1.24191	5.7301	-0.12956
H	0.21299	-7.00674	-0.46484	H	-1.26089	6.79788	-0.19632
C	3.50043	-4.4782	-0.146	C	2.40409	5.04602	-0.12316
C	2.38273	-5.50081	-0.34274	C	1.19108	5.74737	-0.14276
C	5.94486	-3.88637	-0.51287	C	4.82704	5.00767	-0.12164
C	4.95362	-4.87607	-0.43993	C	3.62072	5.72654	-0.14163
C	7.9455	-1.9595	-0.61417	C	7.26051	3.65964	-0.08744
C	8.26683	-3.32083	-0.71455	C	7.22654	5.05931	-0.11762
C	7.28846	-4.26244	-0.66863	C	6.03927	5.71642	-0.13487
H	2.60736	-6.5374	-0.48385	H	1.1888	6.81668	-0.18104
H	5.21066	-5.90512	-0.58081	H	3.63539	6.79612	-0.17074
H	7.54408	-5.29837	-0.74927	H	6.02664	6.78604	-0.15865
H	8.72009	-1.22188	-0.6428	H	8.19945	3.14663	-0.07457
C	-4.6917	-7.01644	-0.30046	C	-5.95636	5.60302	-0.02543
C	-5.99343	-6.6421	-0.21949	C	-7.17644	5.02631	0.06736
C	-5.32199	-4.3185	-0.09548	C	-6.05945	2.90212	0.15072
C	-6.33124	-5.28695	-0.11471	C	-7.24961	3.63818	0.20323
H	-7.35803	-4.99329	-0.04988	H	-8.19299	3.14778	0.32311
C	-5.66377	-2.83816	0.01386	C	-6.0743	1.37355	0.07838
C	-6.99896	-2.42279	0.11058	C	-7.28604	0.66907	0.0539
H	-7.78516	-3.14854	0.11286	H	-8.21393	1.20133	0.0772
C	-6.26794	-0.15308	0.19325	C	-6.07009	-1.38948	-0.02172
C	-7.29569	-1.10433	0.20099	C	-7.28394	-0.68684	0.001
H	-8.31551	-0.78947	0.27715	H	-8.21052	-1.2214	-0.02268
C	-6.58794	1.33779	0.27485	C	-6.05513	-2.9164	-0.08023
C	-7.91169	1.80292	0.27972	C	-7.25079	-3.63629	-0.17159
H	-8.73147	1.13057	0.42412	H	-8.18634	-3.1184	-0.21026
C	-7.05719	3.99269	-0.02253	C	-6.04123	-5.6975	-0.12649
C	-8.13071	3.1689	0.04822	C	-7.22182	-5.03546	-0.21381
C	6.97214	7.48322	-0.08292	H	-5.86127	6.56662	-0.48086
C	9.73668	-3.75069	-0.87705	H	-6.03787	-6.76622	-0.07401
C	-7.10249	-7.71032	-0.24245	H	-1.19169	-6.80977	0.05537
C	-9.55692	3.71347	-0.15408	C	-4.97276	-5.08179	1.44028
O	-9.743	4.98089	-0.38291	C	-8.53675	-5.82621	-0.34579
H	-8.99124	5.57637	-0.42589	C	8.58841	-5.78636	0.06702
O	-8.35144	-7.35342	-0.16354	C	8.54355	5.8572	-0.13136
H	-9.04274	-8.01935	-0.17728	C	-4.76715	5.0292	2.00058
O	10.0391	-5.01299	-0.96945	C	-8.45742	5.87715	-0.01355
H	9.34598	-5.67639	-0.93606	O	-8.51336	-7.12686	-0.37904
O	8.22426	7.13637	-0.15502	H	-9.33308	-7.61973	-0.46127
H	8.4629	6.20797	-0.207	O	-5.03372	-6.24275	2.02513
O	6.64857	8.7417	-0.01245	H	-4.98572	-7.0467	1.50248
O	-10.576	2.90632	-0.09619	O	8.57122	-7.08734	0.08381
O	-6.79058	-8.96979	-0.34062	H	7.73355	-7.55619	0.08769
O	10.6763	-2.85155	-0.9219	O	8.51588	7.15785	-0.15941
H	-2.75042	6.19636	0.20698	H	7.67449	7.61987	-0.17093
C	-6.03416	3.6627	2.12086	O	-9.62411	5.30596	0.06222
O	-6.35389	4.78521	2.69625	H	-10.4225	5.83678	0.01216
H	-6.48068	5.57645	2.16766	O	-3.77259	5.62288	2.59369
O	-5.86223	2.59007	2.83735	H	-3.06479	6.00934	2.0727
H	-7.12462	4.92968	-0.53487	O	-9.67127	-5.19364	-0.42393
C	-4.33205	-8.50922	-0.41762	O	-5.03757	-3.99205	2.1486
O	-5.01369	-9.39676	0.24645	O	9.72376	-5.15054	0.06184
H	-5.74111	-9.12094	0.80884	O	9.68401	5.23084	-0.1149
O	-3.34656	-8.88319	-1.1806	O	-5.72605	4.5036	2.70607
				O	-8.37297	7.1676	-0.15768

## Sheet: 3
Unfunctionalized graphene
g1				g2
C	4.87651	1.05489	0	C	-4.6196	0.51399	-0.90769
C	3.61685	1.70577	0	C	-3.51001	1.29783	-0.518
C	5.03013	-0.34088	0	C	-3.23616	-1.49204	-0.27006
C	2.5341	-0.52745	0	C	-4.50494	-0.8963	-0.69971
C	2.48683	0.87241	0	C	-2.04814	-0.73442	-0.32353
C	0	0.69219	0	C	-2.31869	0.65319	-0.21343
C	1.17265	1.48689	0	C	-0.20876	0.507	0.74922
C	5.31237	-4.62086	0	C	-1.30011	1.33125	0.45833
C	5.22494	-3.16037	0	C	-4.5638	-4.74734	1.1625
C	2.77656	-3.32885	0	C	-4.52064	-3.50224	0.44136
C	3.94785	-2.59873	0	C	-2.17135	-3.16551	1.12657
C	1.47521	-2.76999	0	C	-3.3192	-2.74254	0.43446
C	1.41648	-1.34921	0	C	-0.91233	-2.46335	1.04093
C	-1.0652	-1.53369	0	C	-0.55385	-1.03306	0.30614
C	0.10956	-0.72892	0	C	0.92627	-1.45383	-0.23189
C	4.15283	-5.38639	0	C	-3.3948	-5.21985	1.77157
C	1.7151	-5.57457	0	C	-0.96707	-5.24834	1.845
C	2.88442	-4.79696	0	C	-2.17335	-4.5276	1.67628
C	0.43096	-5.01175	0	C	0.20016	-4.73638	1.26713
C	0.31984	-3.56344	0	C	0.14196	-3.35186	0.86811
C	-0.96829	-2.9567	0	C	1.17831	-2.79167	0.10667
C	1.06524	2.91903	0	C	-1.35828	2.73316	0.59666
C	-1.28894	1.30753	0	C	1.02256	1.23204	0.69873
C	-0.21837	3.52418	0	C	-0.18797	3.41091	0.95238
C	-1.3921	2.73109	0	C	1.02227	2.67223	0.91891
C	3.51077	3.12228	0	C	-3.62877	2.7071	-0.30666
C	2.2344	3.73167	0	C	-2.54489	3.42437	0.23611
C	-2.35907	-0.92177	0	C	2.13747	-0.69048	-0.29512
C	-2.4703	0.51023	0	C	2.21582	0.66433	0.16667
C	-2.14024	-3.75915	0	C	2.37065	-3.48845	-0.10206
C	4.68806	3.93484	0	C	-4.82483	3.36816	-0.68707
C	-0.73562	-5.7888	0	C	1.36787	-5.47485	0.95913
C	-2.01896	-5.20631	0	C	2.46027	-4.88548	0.27087
C	-3.1858	-5.98282	0	C	3.63726	-5.56403	-0.08802
C	-4.46614	-5.4004	0	C	4.73642	-4.88621	-0.67835
C	-4.59731	-3.96506	0	C	4.69046	-3.45671	-0.85677
C	-3.42122	-3.15406	0	C	3.47068	-2.77393	-0.59153
C	-3.52885	-1.72186	0	C	3.37804	-1.35042	-0.59671
C	-5.64117	-6.19978	0	C	5.93125	-5.56129	-1.03898
C	-6.88862	-5.60844	0	C	7.02096	-4.85015	-1.51757
C	-7.01994	-4.21061	0	C	6.99614	-3.44977	-1.60425
H	-8.01566	-3.79023	0	H	7.88868	-2.93485	-1.93286
C	-5.89563	-3.37326	0	C	5.84415	-2.72807	-1.24976
C	-4.82614	-1.1069	0	C	4.59686	-0.60464	-0.74225
C	-6.00507	-1.91071	0	C	5.80241	-1.26346	-1.13775
C	-3.74788	1.12407	0	C	3.41441	1.39685	0.09261
C	-4.93506	0.32386	0	C	4.6144	0.78774	-0.41739
C	-7.25076	-1.26356	0	C	6.95839	-0.47984	-1.2961
C	-6.22106	0.94239	0	C	5.8258	1.52645	-0.50242
C	-7.35481	0.11634	0	C	6.97013	0.8702	-0.99055
H	-8.34432	0.55159	0	H	7.89938	1.41088	-1.10321
H	-5.53895	-7.27891	0	H	5.98368	-6.63794	-0.92567
H	-3.10007	-7.06406	0	H	3.72681	-6.62637	0.11126
H	-0.6493	-6.86963	0	H	1.42069	-6.52113	1.23831
H	4.23082	-6.46722	0	H	-3.39404	-6.21347	2.20677
H	-8.16299	-1.84293	0	H	7.88053	-0.93942	-1.62473
C	-2.67812	3.3451	0	C	2.24717	3.40186	0.903
C	-3.85037	2.5561	0	C	3.4485	2.77065	0.5183
C	-5.13488	3.18507	0	C	4.66242	3.51802	0.44336
C	-6.32913	2.4051	0	C	5.86247	2.92356	-0.05046
C	4.56531	5.37174	0	C	-4.89679	4.79973	-0.52845
C	2.12391	5.17759	0	C	-2.60585	4.85721	0.39611
C	3.28789	5.96154	0	C	-3.79625	5.50819	0.01339
H	3.20128	7.04214	0	H	-3.86971	6.5856	0.11519
C	-0.3257	4.96995	0	C	-0.22321	4.85465	1.08741
C	0.83883	5.75472	0	C	-1.44708	5.53013	0.86671
H	0.74636	6.8353	0	H	-1.47464	6.60917	0.97404
C	-2.77743	4.78943	0	C	2.2296	4.82952	1.18389
C	-1.59994	5.56146	0	C	0.99897	5.51455	1.31027
C	-5.22279	4.62423	0	C	4.66305	4.90026	0.85091
C	-4.04478	5.39124	0	C	3.45296	5.51962	1.21259
C	-7.56441	3.0693	0	C	7.03177	3.69293	-0.07596
C	-7.64631	4.47097	0	C	7.04017	5.02917	0.36199
C	-6.5024	5.24287	0	C	5.88328	5.63054	0.81233
H	-1.67974	6.64307	0	H	1.01084	6.58804	1.46328
H	-4.11809	6.47318	0	H	3.45771	6.57503	1.4626
H	-6.56111	6.32495	0	H	5.88257	6.66713	1.12881
H	-8.48616	2.5048	0	H	7.95793	3.26714	-0.43604
C	5.75213	6.15512	0	C	-6.08784	5.45776	-0.94688
C	6.99176	5.54709	0	C	-7.13301	4.7334	-1.4877
C	5.97555	3.32592	0	C	-5.92785	2.62222	-1.22118
C	7.11313	4.14867	0	C	-7.06359	3.33234	-1.62241
H	8.10518	3.72102	0	H	-7.91251	2.81009	-2.04419
C	6.07563	1.86012	0	C	-5.84812	1.14562	-1.24968
C	7.31668	1.21541	0	C	-6.94824	0.30787	-1.47972
H	8.2315	1.78922	0	H	-7.90551	0.72365	-1.76638
C	6.25742	-0.98689	0	C	-5.68667	-1.68381	-0.79233
C	7.40583	-0.15311	0	C	-6.86448	-1.06216	-1.2483
H	8.37942	-0.6197	0	H	-7.76685	-1.64744	-1.36112
C	6.43173	-2.42634	0	C	-5.68579	-3.0557	-0.26263
C	7.66096	-3.0692	0	C	-6.81271	-3.87599	-0.28639
H	8.58108	-2.50376	0	H	-7.70051	-3.56792	-0.82181
C	6.60141	-5.23279	0	C	-5.75646	-5.52847	1.13338
C	7.74583	-4.47727	0	C	-6.84367	-5.1067	0.40319
H	5.66479	7.23553	0	H	-6.15965	6.53404	-0.84036
H	6.64678	-6.31555	0	H	-5.78051	-6.46523	1.67809
H	1.81999	-6.6537	0	H	-1.00237	-6.26088	2.23025
H	-7.78084	-6.22306	0	H	7.92371	-5.37837	-1.80023
H	-8.62106	4.94322	0	H	7.96709	5.58882	0.33104
H	7.89086	6.15225	0	H	-8.03077	5.24597	-1.8119
H	8.71904	-4.95086	0	H	-7.74196	-5.7106	0.36369
g3				g4
C	4.82005	0.72435	0.04949	C	-4.74172	-0.76493	0.45212
C	3.56518	1.42348	0.02685	C	-3.49103	-1.43775	0.28808
C	3.6053	-1.43116	0.20586	C	-3.55355	1.41991	0.3259
C	4.83979	-0.70988	0.15255	C	-4.76485	0.67164	0.53483
C	2.38059	-0.72803	0.21808	C	-2.35258	0.73981	0.09753
C	2.36002	0.7151	0.14535	C	-2.32111	-0.68613	0.16256
C	-0.06694	0.68609	0.25339	C	0.00513	-0.66852	-0.52188
C	1.11596	1.42194	0.15093	C	-1.1126	-1.35808	-0.03986
C	4.82532	-5.02941	0.24659	C	-4.75754	4.99168	0.55181
C	4.84085	-3.58471	0.23492	C	-4.77915	3.54895	0.54667
C	2.37912	-3.58695	0.2122	C	-2.35671	3.57109	0.05306
C	3.60366	-2.8709	0.22413	C	-3.56039	2.85558	0.30314
C	1.14836	-2.88334	0.21661	C	-1.14715	2.86752	-0.20731
C	1.16069	-1.45429	0.24646	C	-1.15984	1.44946	-0.20462
C	-1.2751	-1.47138	0.21417	C	1.24288	1.39145	-0.68733
C	-0.06321	-0.75012	0.26268	C	0.02095	0.74131	-0.5045
C	3.59775	-5.72149	0.21057	C	-3.55028	5.6864	0.31128
C	1.13309	-5.72897	0.11288	C	-1.10197	5.69044	-0.16165
C	2.3682	-5.04	0.183	C	-2.3346	5.01999	0.05924
C	-0.0992	-5.0369	0.08277	C	0.11377	5.00129	-0.3785
C	-0.08333	-3.59402	0.15779	C	0.08212	3.55064	-0.4253
C	-1.30145	-2.88756	0.13539	C	1.28224	2.81475	-0.61203
C	0.99777	2.83853	-0.03169	C	-0.9129	-2.74312	-0.04823
C	-1.28159	1.36984	0.25643	C	1.06093	-1.51022	-0.82991
C	-0.3226	3.54228	-0.07836	C	0.6359	-3.03319	-0.5545
C	-1.55547	2.78881	0.15635	C	-3.3992	-2.82608	-0.01907
C	3.50676	2.84499	-0.15803	C	-2.1232	-3.43847	-0.31225
C	2.24594	3.52353	-0.22938	C	2.42085	0.58953	-0.68586
C	-2.49151	-0.75913	0.16711	C	2.3334	-0.86748	-0.62514
C	-2.4419	0.61897	0.21559	C	2.54364	3.4628	-0.62734
C	-2.5498	-3.5528	-0.00237	C	-4.61396	-3.55016	-0.20483
C	4.7291	3.57038	-0.30614	C	1.3703	5.63667	-0.52286
C	-1.34496	-5.69934	-0.03739	C	2.58494	4.91036	-0.61121
C	-2.57059	-4.98481	-0.09729	C	3.85249	5.52415	-0.64497
C	-3.81826	-5.63088	-0.26863	C	5.04455	4.77279	-0.58012
C	-5.02633	-4.90275	-0.36986	C	4.98905	3.33509	-0.46712
C	-5.00652	-3.46007	-0.28923	C	3.72516	2.68735	-0.55269
C	-3.76044	-2.81076	-0.09054	C	3.65906	1.24252	-0.50677
C	-3.73401	-1.39717	-0.00131	C	6.32352	5.4004	-0.57692
C	-6.2754	-5.5566	-0.5623	C	7.47274	4.64847	-0.4403
C	-7.43463	-4.81133	-0.67429	C	7.41049	3.25248	-0.26425
C	-7.40968	-3.40619	-0.60574	H	8.33493	2.70456	-0.1383
H	-8.34695	-2.87326	-0.70112	C	6.18504	2.57965	-0.25332
C	-6.21619	-2.69039	-0.41695	C	4.8118	0.48778	-0.14298
C	-4.90717	-0.59622	-0.127	C	6.0689	1.14032	0.03747
C	-6.16382	-1.21671	-0.34971	C	3.4072	-1.55616	-0.04566
C	-3.54465	1.45983	0.11146	C	4.65523	-0.90405	0.18536
C	-4.80955	0.84349	-0.04839	C	7.1273	0.38806	0.55985
C	-7.28003	-0.35815	-0.51172	C	5.74494	-1.61741	0.765
C	-5.93452	1.66842	-0.16092	C	6.96467	-0.94756	0.92119
C	-7.17668	1.02612	-0.42086	H	7.81913	-1.46454	1.33572
H	-8.07943	1.60638	-0.55667	H	6.37739	6.47818	-0.67954
H	-6.30354	-6.63805	-0.62094	H	3.91842	6.60643	-0.67984
H	-3.85286	-6.71291	-0.33631	H	1.41508	6.72054	-0.50724
H	-1.36254	-6.78235	-0.10096	H	-3.56501	6.77118	0.32622
H	3.60533	-6.80571	0.20008	H	8.09079	0.85027	0.72812
H	-8.25736	-0.77889	-0.71259	C	1.95122	-3.59049	0.14704
C	-3.17043	2.83449	0.16313	C	3.18132	-2.92955	0.34166
C	-4.38055	3.68962	0.35653	C	4.3158	-3.67941	0.84587
C	-5.71728	3.096	0.11976	C	5.5611	-3.03201	1.12718
C	4.69059	4.98548	-0.54989	C	-4.56549	-4.86213	-0.80163
C	2.24864	4.92327	-0.54329	C	-2.15115	-4.5935	-1.17949
C	3.43803	5.62207	-0.68918	C	-3.34767	-5.30646	-1.36477
H	3.40913	6.68258	-0.91547	H	-3.34604	-6.19754	-1.98284
C	-0.21262	4.94423	-0.47101	C	0.31135	-4.35965	-1.45568
C	0.9871	5.56133	-0.6985	C	-0.95716	-4.89281	-1.8406
H	0.985	6.60816	-0.98375	H	-0.93033	-5.76415	-2.48958
C	-2.26849	5.89209	0.35407	C	2.08122	-5.0041	-0.07788
C	-1.37659	5.84577	-0.589	C	1.16231	-5.38976	-1.08202
C	-4.42009	5.00824	0.91549	C	4.21931	-5.10397	1.02544
C	-3.2033	5.77954	1.2472	C	3.11766	-5.7652	0.43413
C	-6.88122	3.8733	0.31074	C	6.59019	-3.78217	1.71201
C	-6.84752	5.15651	0.81618	C	6.45082	-5.15443	1.96931
C	-5.60899	5.69848	1.15071	C	5.29679	-5.81929	1.60639
H	-1.36598	6.57509	-1.39674	H	1.04344	-6.40985	-1.42294
H	-3.19019	6.34654	2.17553	H	3.14559	-6.83788	0.28212
H	-5.54982	6.68795	1.59044	H	5.20209	-6.88972	1.74539
H	-7.84313	3.42309	0.10861	H	7.52739	-3.30721	1.96673
C	5.90314	5.71046	-0.66801	C	-5.76935	-5.60374	-0.92202
C	7.11565	5.06072	-0.55263	C	-6.96684	-5.06086	-0.49121
C	5.99944	2.90718	-0.22044	C	-5.87854	-2.95393	0.1257
C	7.16358	3.67394	-0.33665	C	-7.02832	-3.74833	0.00553
H	8.13401	3.20229	-0.26657	H	-7.99519	-3.34433	0.27452
C	6.0399	1.44913	-0.04552	C	-5.94231	-1.51961	0.46725
C	7.24435	0.72542	0.00021	C	-7.14278	-0.81333	0.68733
H	8.19179	1.2423	-0.06173	H	-8.0861	-1.34221	0.72324
C	6.07994	-1.41192	0.1725	C	-5.99403	1.35456	0.72963
C	7.2628	-0.6568	0.10752	C	-7.16244	0.56923	0.8305
H	8.2243	-1.15138	0.1248	H	-8.12023	1.04855	0.98292
C	6.08613	-2.88202	0.23611	C	-6.00118	2.83123	0.77823
C	7.27181	-3.63024	0.27841	C	-7.16396	3.56892	1.02716
H	8.23043	-3.13039	0.29036	H	-8.10231	3.06475	1.21563
C	6.06198	-5.72947	0.28351	C	-5.97796	5.679	0.80856
C	7.25478	-5.03421	0.30515	C	-7.14349	4.97629	1.04261
H	5.86	6.77821	-0.84946	H	-5.73756	-6.59331	-1.36272
H	6.05051	-6.81297	0.29533	H	-5.97614	6.76309	0.81872
H	1.13782	-6.81264	0.07107	H	-1.09042	6.77489	-0.13459
H	-8.38419	-5.31094	-0.81988	H	8.44099	5.13447	-0.45057
H	-7.76115	5.71494	0.97722	H	7.27145	-5.69423	2.42583
H	8.04195	5.61569	-0.63716	H	-7.88056	-5.63698	-0.57061
H	8.19452	-5.57189	0.33832	H	-8.06452	5.51179	1.24096
