# Supplementary figures and images for: Underlying mechanisms of reactive oxygen species and oxidative stress photoinduced by graphene and its surface-functionalized derivatives
Source: Royal Society of Chemistry journal article supplement (doi:10.1039/c9en01295h), 2020-01-01

### Workflow materials models: template 3

### DFT calculation

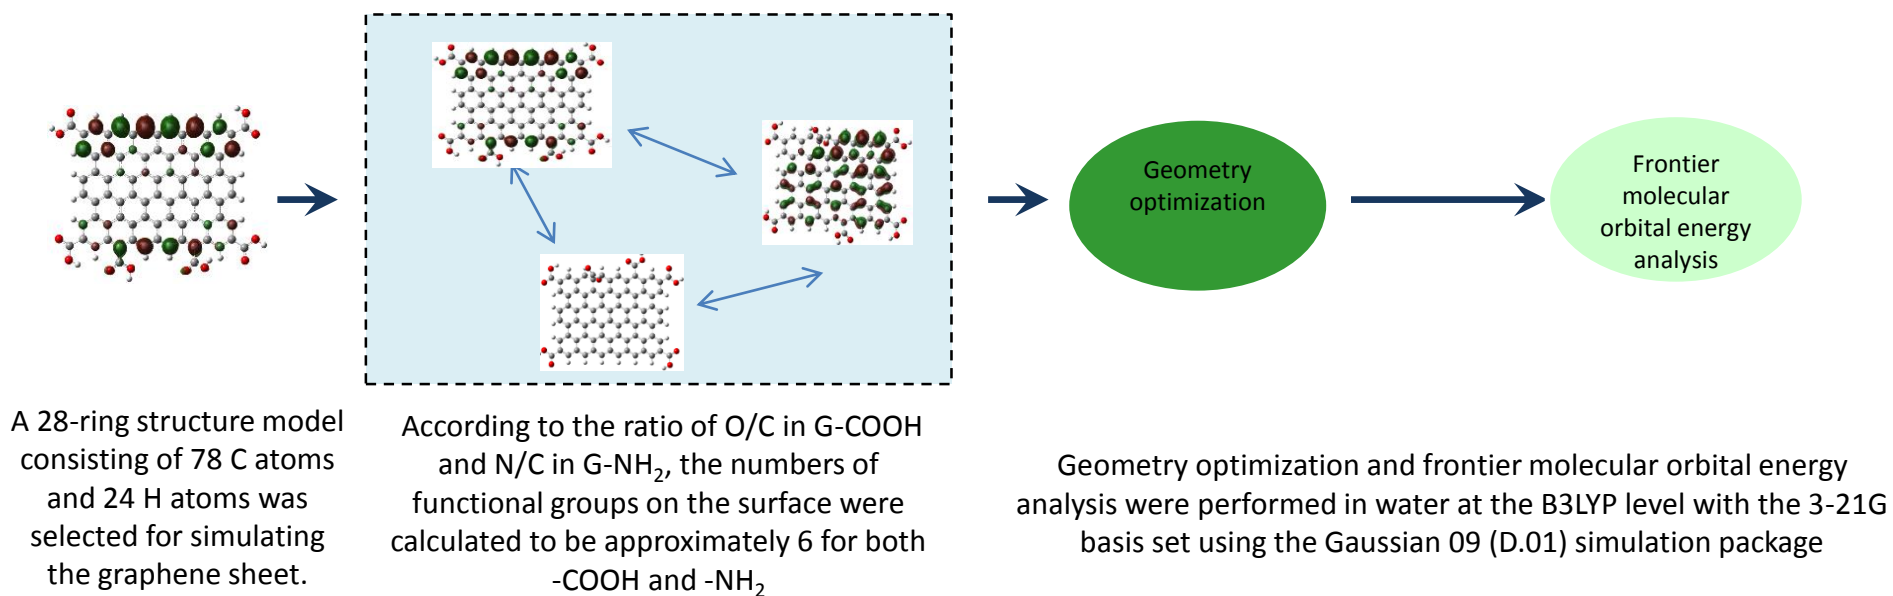

Supplement: c9en01295h1.pdf [file c9en01295h1.pdf]
